# Supplementary figures and images for: Presence of Cosmetic and Aesthetic Surgery on TikTok
Source: PubMed Central journal article supplement — Plast Reconstr Surg Glob Open. 2022 Sep 21;10(9):e4519. doi: 10.1097/GOX.0000000000004519 (PMC9509022; doi:10.1097/gox.0000000000004519), 2022-09-21

# Uploader

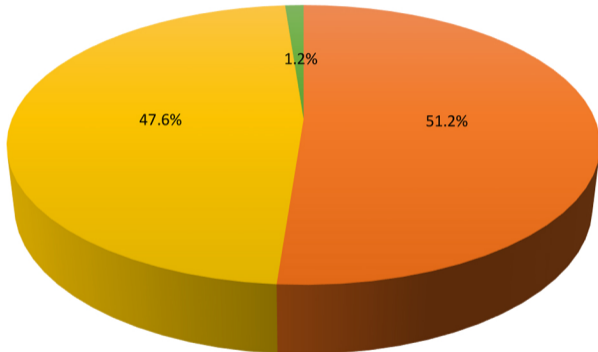

■ Individual Physician   ■ Individual-Non-Physician   ■ Private Practice or Business

Supplement: gox-10-e4519-s001.pdf [file gox-10-e4519-s001.pdf]

# Video Categories for All Post

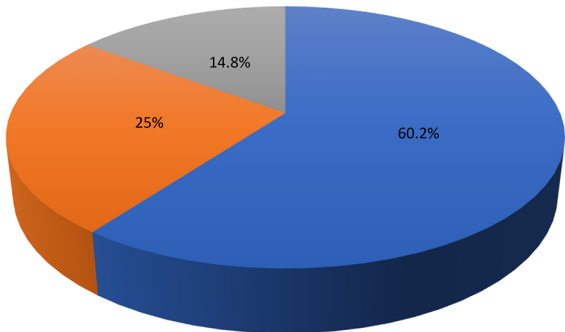

**■ Promotional**   **■ Educational**   **■ Personal**

Supplement: gox-10-e4519-s002.pdf [file gox-10-e4519-s002.pdf]
